# Supplementary material
Source: PubMed Central journal article supplement (PMC7321857)
Supplement: NIHMS1589055-supplement-216_2020_2678_MOESM1_ESM.pdf [file NIHMS1589055-supplement-216_2020_2678_MOESM1_ESM.pdf]

**Analytical and Bioanalytical Chemistry**

**Electronic Supplementary Material**

**Identification of adulteration in botanical samples with untargeted metabolomics**

E. Diane Wallace, Daniel A. Todd, James M. Harnly, Nadja B. Cech, Joshua J. Kellogg

## **Content**

**Figure S1. Structures of Key Compounds in *Hydrastis canadensis* and *Coptis chinensis***

**Table S1. *m/z* Values of Key Compounds and the Species Associated**

**Table S2. Concentrations of Palmatine used for Calibration Curves**

**Table S3. *m/z* Values of Key Compounds and the Species Associated**

**Table S4. Concentrations of Palmatine used for Calibration Curves**

**Figure S2. PCA Scores Plot Showing All Samples with the 95% Confidence Interval**

**Figure S3. Highest Percentage of Adulterated Sample that was not an Outlier on all Platforms**

**Figure S4. Stacked LC-UV Total Absorbance Chromatograms**

**Figure S5. Calibration Curves for Palmatine**

**Figure S6. Composite Score Analysis Plot with all Positive Connections**

**Figure S7. Peak Integration of Hydrastine**

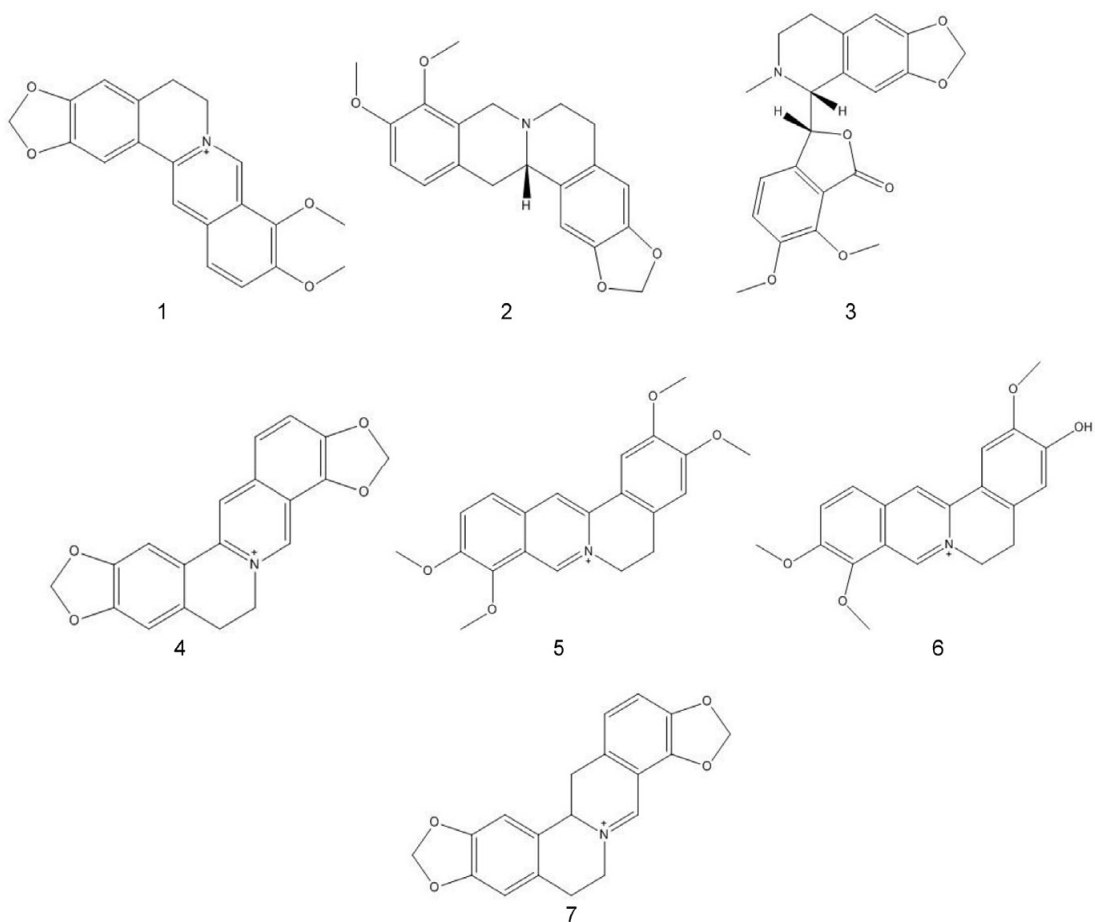

**Fig. S1** Structures of Key Compounds in *Hydrastis canadensis* and *Coptis chinensis*. These compounds were confirmed using exact mass and retention time. The compounds are berberine (1), canadine (2), hydrastine (3), coptisine (4), palmatine (5), jatrorrhizine (6), and 13,14 dihydrocoptisine (7).

**Table S1** List of the botanical products used with assigned sample code, product composition, and form of product. GS-12 was eliminated from this study due to unexpected adulteration, all other samples GS-1 through GS-11 were considered to be authentic *Hydrastis canadensis* based upon profiling via mass spectrometry. GS-13 and GS-14 are the botanical reference material purchased from Chromadex for *Hydrastis canadensis* and *Coptis chinensis*, respectively

| <b>Sample Code</b> | <b>Composition</b>                  | <b>Form</b>  |
|--------------------|-------------------------------------|--------------|
| <b>GS-1</b>        | Root                                | Capsule      |
| <b>GS-2</b>        | Root                                | Capsule      |
| <b>GS-3</b>        | Root                                | Capsule      |
| <b>GS-4</b>        | Root                                | Capsule      |
| <b>GS-5</b>        | Root                                | Capsule      |
| <b>GS-6</b>        | Root                                | Capsule      |
| <b>GS-7</b>        | Root                                | Capsule      |
| <b>GS-8</b>        | Root                                | Capsule      |
| <b>GS-9</b>        | Root                                | Capsule      |
| <b>GS-10</b>       | Root/rhizome                        | Capsule      |
| <b>GS-11</b>       | Root                                | Capsule      |
| <b>GS-13</b>       | <i>Hydrastis canadensis</i><br>root | Loose Powder |
| <b>GS-14</b>       | <i>Coptis chinensis</i><br>root     | Loose Powder |

**Table S2** Composition of adulterated supplements. *Hydrastis canadensis* and *Coptis chinensis* material were weighed out in different masses to arrive at a variety of percentages to a total mass of 200 mg. The percentage of *Coptis chinensis* is synonymous with the percentage of adulteration of the supplement

| Sample Name | % w/w of <i>C. chinensis</i> | Mass <i>C. chinensis</i> | Mass <i>H. canadensis</i> |
|-------------|------------------------------|--------------------------|---------------------------|
| A-5         | 5%                           | 10 mg                    | 190 mg                    |
| A-10        | 10%                          | 20 mg                    | 180 mg                    |
| A-25        | 25%                          | 50 mg                    | 150 mg                    |
| A-50        | 50%                          | 100 mg                   | 100 mg                    |
| A-75        | 75%                          | 150 mg                   | 50 mg                     |
| A-90        | 90%                          | 180 mg                   | 20 mg                     |
| A-95        | 95%                          | 190 mg                   | 10 mg                     |

**Table S3** m/z Values of Key Compounds and the Species Associated

| Compound Name    | m/z Value | Species Associated                            |
|------------------|-----------|-----------------------------------------------|
| Berberine        | 336.1229  | <i>Hydrastis canadensis, Coptis chinensis</i> |
| Hydrastine       | 384.1440  | <i>Hydrastis canadensis</i>                   |
| Canadine         | 340.1545  | <i>Hydrastis canadensis</i>                   |
| Sideroxylin      | 313.1066  | <i>Hydrastis canadensis</i>                   |
| Coptisine        | 320.0916  | <i>Coptis chinensis</i>                       |
| Dihydrocoptisine | 322.1074  | <i>Coptis chinensis</i>                       |
| Palmatine        | 352.1543  | <i>Coptis chinensis</i>                       |
| Jatorrhizine     | 338.1392  | <i>Coptis chinensis</i>                       |

**Table S4** Concentrations of Palmatine used for Calibration Curves

| LC-UV ( $\mu\text{g/mL}$ ) | LC-MS (Orbitrap ( $\mu\text{g/mL}$ )) | LC-MS (Q-ToF) ( $\mu\text{g/mL}$ ) |
|----------------------------|---------------------------------------|------------------------------------|
| 0.048*                     | 0.0025                                | 0.048*                             |
| 0.097                      | 0.0050                                | 0.097                              |
| 0.19                       | 0.012                                 | 0.19                               |
| 0.39                       | 0.025                                 | 0.39                               |
| 1.5                        | 0.048                                 | 1.5                                |
| 3.1                        | 0.097                                 | 3.1                                |
| 6.2                        | 0.19                                  | 6.2                                |
| 12.5                       | 0.39                                  | 12.5                               |
| 25*                        | 0.78                                  | 25*                                |

\*Concentration not included in calibration curve due to being outside the linear dynamic range.

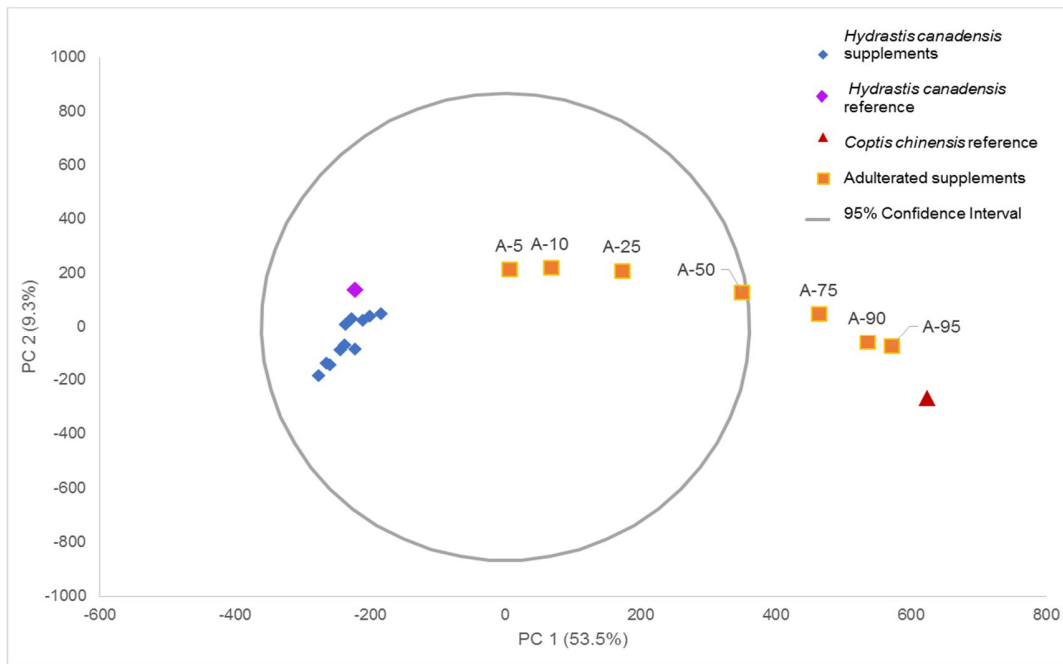

**Fig. S2** PCA Scores Plot Showing All Samples with the 95% Confidence Interval

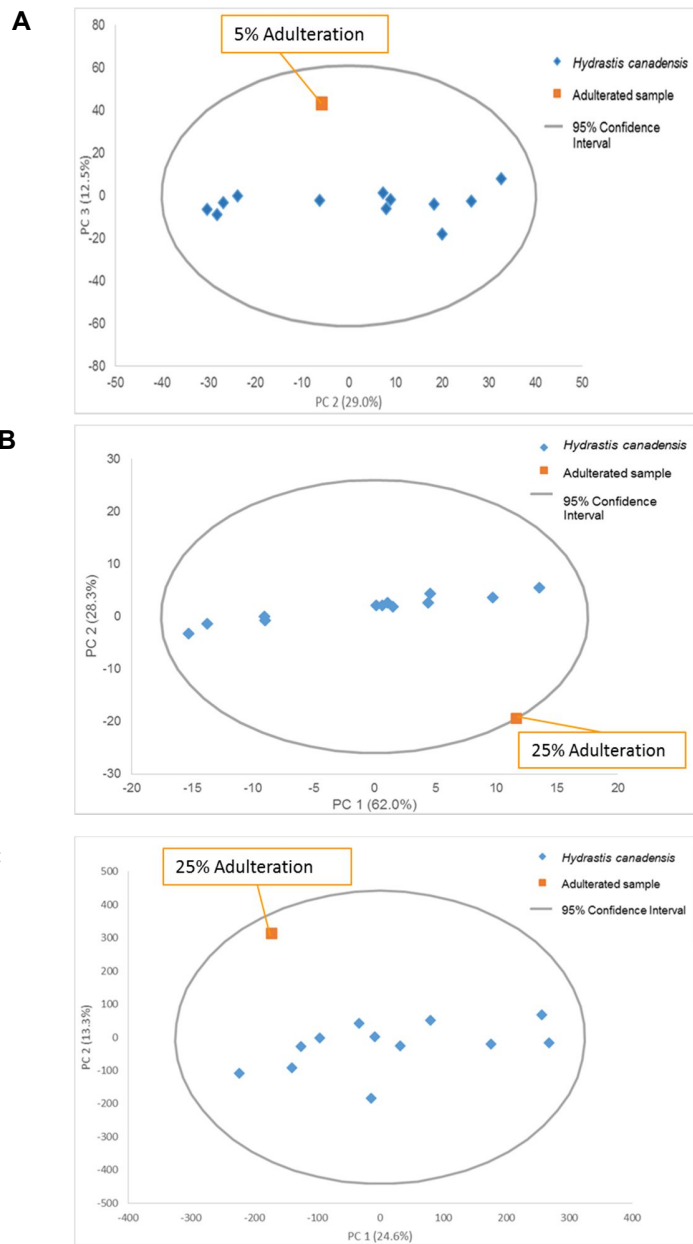

**Fig. S3** Highest Percentage of Adulterated Sample that was not an Outlier on all Platforms. The lowest percentage not considered an outlier for the Orbitrap was 5% (A), for LC-UV 25% (B), and for the Q-ToF 25% (C)

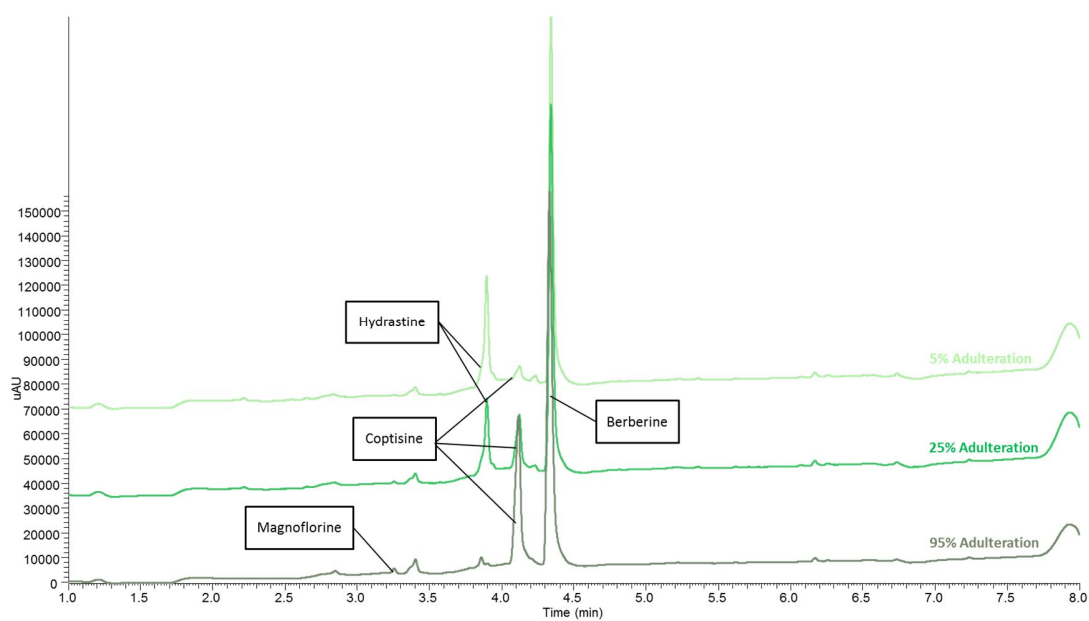

**Fig. S4** Stacked LC-UV Total Absorbance Chromatograms

Though absorbance was not able to be separated and used as a variable, the total absorbance chromatogram (TAC) of each sample was used in the metabolomics. This stack of chromatograms shows the time versus the intensity of 5% adulteration (light green), 25% adulteration (green), and 95% adulteration (dark green). Peaks were labelled due to the retention time, absorbance, and  $m/z$  value obtained from the concurrent mass spectrometry analysis.



**A**

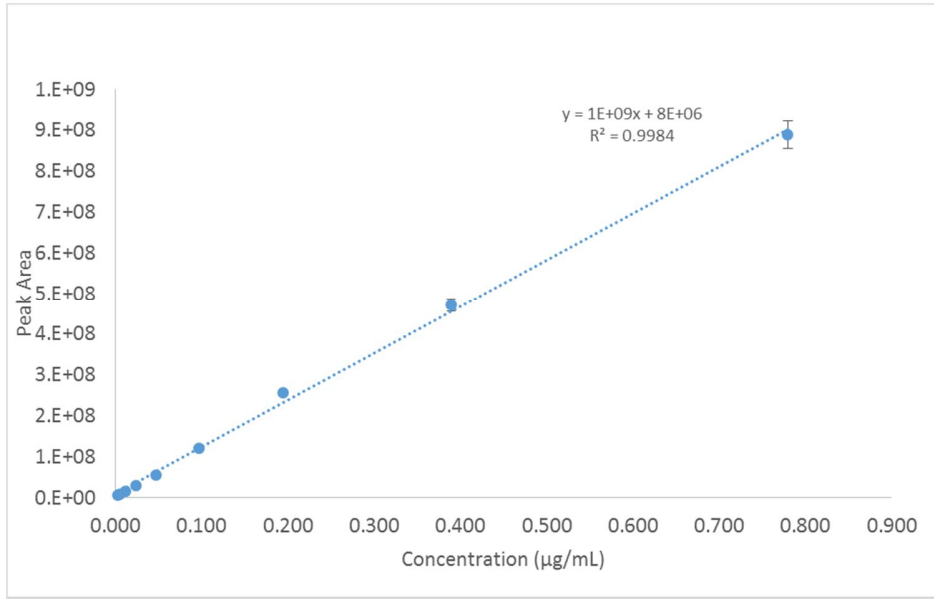

**B**

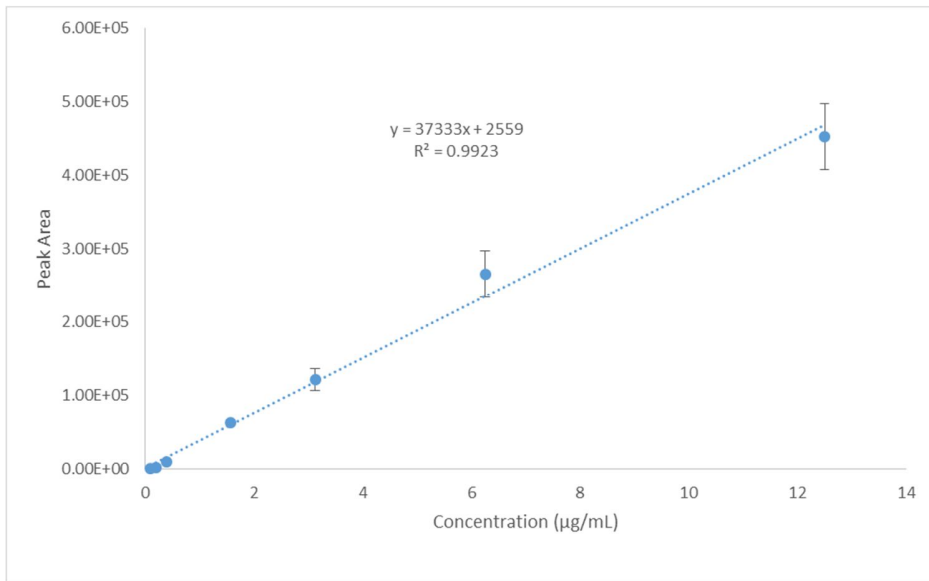

**C**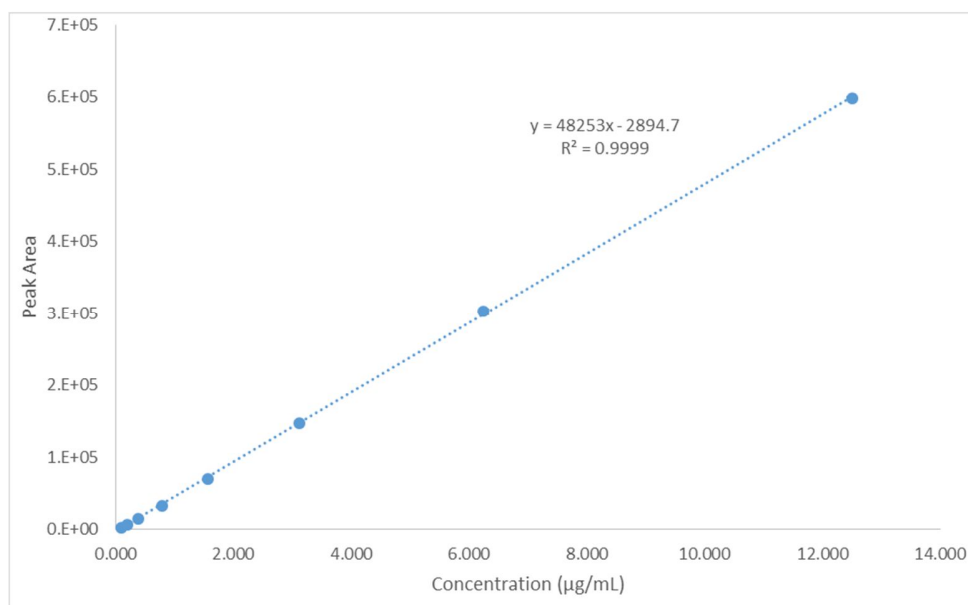**Fig. S5** Calibration Curves for Palmatine

The Orbitrap (A) calibration curve was executed using lower concentrations. The Q-ToF (B) and LC-UV (C) curves both use the same concentrations of palmatine. Error bars are indicative of the standard deviation of technical replicates of each concentration

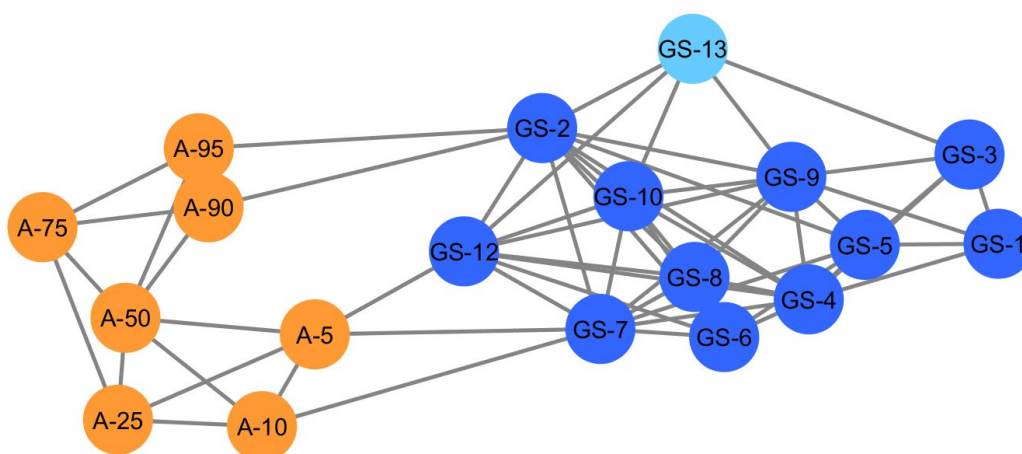**Fig. S6** Composite Score Analysis Plot with all Positive Connections

This plot shows all positive connections with a similarity score above 0. This shows that there are still connections within the two groups, which is feasible given *H. canadensis* and *C. chinensis* are from the same family and have similar phytochemical profiles. However, it is clear that the two groups are still distinct at this level.
